# Supplementary material for: Pattern of contraceptive use, determinants and fertility intentions among tribal women in Kerala, India: a cross-sectional study
Source: HighWire-hosted journal article supplement (doi:10.1136/bmjopen-2021-055325), 2022-04-01
Supplement: bmjopen-2021-055325supp001_data_supplement.pdf [file bmjopen-2021-055325supp001_data_supplement.pdf]

## **Supplement – 1**

### **Sample size calculation**

According to a study conducted in Wayanad the contraceptive use among tribals of Wayanad was 40.7%.<sup>9</sup> With 95% confidence interval and 10% relative precision using the formula  $(Z_{1-\alpha/2})^2 pq/d^2$  the sample size was calculated to be 583. With a design effect of 2 a final sample size of 1166 was obtained rounded to 1200 for each block.
