# Supplementary material for: Pattern of contraceptive use, determinants and fertility intentions among tribal women in Kerala, India: a cross-sectional study
Source: HighWire-hosted journal article supplement (doi:10.1136/bmjopen-2021-055325), 2022-04-01
Supplement: bmjopen-2021-055325supp002_data_supplement.pdf [file bmjopen-2021-055325supp002_data_supplement.pdf]

## Pattern of contraceptive use, determinants and fertility intentions among tribal women in Kerala, India: A cross sectional study

1. Sl no:
2. Phone no:
3. Ward:
4. Panchayat
5. CD block
6. Age:
7. What is your highest level of education (woman in the reproductive age group)
  - a) Literate b) Illiterate c) Primary d) Graduate/Post Graduate
8. What is your occupation a) Coolie b) Traditional work c) Housewife d) Professional e) Others-specify
9. Income

| Sl no               | Family members | Income        |                  |
|---------------------|----------------|---------------|------------------|
|                     |                |               |                  |
|                     |                |               |                  |
|                     |                |               |                  |
|                     |                |               |                  |
|                     |                |               |                  |
|                     |                |               |                  |
| Total no of members |                | Family income | Percapita income |

10. Type of house a) Kucha b) Pucca c) Others (specify)
11. Tribal group: a) Adiya b) Paniya c) Kattunaikkan d) Kurichiyan e) Oorali kuruma
- f) Others (Specify)

### Personal Information

12. Marital status a) Married b) Divorce c) Widow d) Not married e) Separated
- f) Unmarried mother
13. In the last one month have you used any tobacco product such as Beedi/ Cigarette / Chewing tobacco) ? a) Yes b) No
14. Have you used alcohol in the past one month? a) Yes b) No

### Menstrual History

15. Age of attainment of menarche
16. a) Is your menstrual cycles regular? a) Yes b) No
- b) How frequently does your menstruation cycles occur? -----days

17. How many days your cycle last? -----days
18. Do you have dysmenorrhea? a) Yes b) No
19. Do you have intermenstrual bleeding/spotting? a) Yes b) No
20. Ask married woman above 18 yrs: After sexual contact do you have bleeding/spotting?  
a) Yes b) No c) Not Applicable(for unmarried woman below 18 yrs)
21. Last menstrual period------(day/month/year)

**Obstetric history (Ask to those who were pregnant for at least one time )**

22. Are you pregnant now? a) Yes b) No
23. If yes how many times have you been pregnant? (Including current pregnancy)
24. How many newborns (who have completed 7 months/28 weeks of gestation have you given birth to ?
25. How many children do you have?
26. a) History of abortions? a) Yes b) No  
b) If yes how many?
27. What type of abortion was the last one ?  
a) Modern medical technique b) Traditional c) Natural d) Others (specify)

**Knowledge of contraceptives**

28. Have you heard about contraceptives a) Yes b) No
29. If yes, what was your source of information about contraception?  
(Multiple responses)  
a) Friends/Relatives b) Media/Print c) Health workers d) Doctors  
e) Others (specify)
30. What does the term contraceptive methods mean ?
31. Which all contraceptive methods are you aware of ? (If there is no response ,pl probe)  
(Multiple responses)  
a) Hormonal pills/ Injectables b) IUD c) Condom (Nirodh) d) Others (specify)
32. Have you heard about oral contraceptive pills? a) Yes b) No (If no go to Q 37)
33. How should the tablets that are a part of the oral contraceptive pills be taken? (How many days after periods)  
a) 1<sup>st</sup> day b) 5<sup>th</sup> day c) 10<sup>th</sup> day d) Don't know

34. How frequently should oral contraceptive pills be taken?
- a) Daily b) Alternate days c) Weekly once d) Monthly once e) Don't know
  - f) Others specify
35. How many tablets are there in a pack of oral contraceptive pills?
36. What are the side effects of oral contraceptive pills?
- a) Infertility b) Irregular periods c) Obesity d) Vomiting e) No side effects
  - f) Don't know g) Others specify
37. Have you heard about emergency contraception? a) Yes b) No
38. What do you understand by the term emergency contraception?
39. Can emergency contraception be a substitute for regular contraception methods? a) Yes b) No c) Don't know
40. Do you think contraceptive methods are completely effective in preventing pregnancy? a) Yes b) No c) Don't know

**Attitude**

**Please mark against each statement the attitude which corresponds to the viewpoint of f the respondent**

|    |                                                                                                                                 | Strongly agree | Agree | Don't know | Disagree | Strongly disagree |
|----|---------------------------------------------------------------------------------------------------------------------------------|----------------|-------|------------|----------|-------------------|
| 41 | Females should take an active role in the use of contraceptive methods                                                          |                |       |            |          |                   |
| 42 | Females and males have equal role in taking decisions on use of contraceptives                                                  |                |       |            |          |                   |
| 43 | Opinion regarding sexual intercourse without female partners consent                                                            |                |       |            |          |                   |
| 44 | Opinion regarding Sexual contact among adolescents before 18 years of age                                                       |                |       |            |          |                   |
| 45 | Opinion regarding pre-marital sex                                                                                               |                |       |            |          |                   |
| 46 | Use of contraception by unmarried woman is against woman's morality                                                             |                |       |            |          |                   |
| 47 | Emergency contraception can be used routinely like other contraceptive methods                                                  |                |       |            |          |                   |
| 48 | Contraceptive pills can be used for longer duration (>3 months) to prevent pregnancy                                            |                |       |            |          |                   |
| 49 | Contraceptive pills can be used for more than 3 months for treatment of menstrual disorders                                     |                |       |            |          |                   |
| 50 | Contraceptive pills can be used for long duration (>3 months) for delaying menstrual cycle                                      |                |       |            |          |                   |
| 51 | Contraceptive pills can be used for prolonged periods so that you don't have to follow the practice of staying in "Valaymapura" |                |       |            |          |                   |

**Practices**

52. Have you ever used any contraceptive methods?

a) Yes b) No If no go to Q 59

53. Are you currently (within the past one month) using a contraceptive method?

a) Yes b) No

54. Which of the following contraceptive measures are you using?

a) Condom b) Oral pills c) Cu T d) Permanent sterilization e) Others specify

55. Condom-----how many months of use

Oral pills-----how many months of use

CuT-----how many months of use (one that you used last)

56. If you have used any temporary method of contraception, from where did you get it?

57. Why did you choose the contraceptive method which you have used recently?

a) To avoid unwanted pregnancy b) To attend religious function c) By partners  
compulsion d) Don't know e) Not applicable

58. Did you have any unplanned pregnancy? a) Yes b) No c) Don't know

59. Have you used any emergency contraceptive methods? a) Yes b) No c) Don't know

60. Reasons for not using any contraceptive methods?

- a) Infrequent sexual contacts wouldn't result in pregnancy
- b) Contraceptive methods are expensive
- c) Worried about side effects
- d) Partners disinterest in contraceptive method usage
- e) Discomfort in buying contraceptive methods
- f) Use of contraceptive methods results in decrease in pleasure during contact
- g) Don't know how to use contraceptives
- h) No sexual contacts
- i) Others (specify)

61. How often have you used oral pills?

a) Always b) Many times c) Rarely d) Once in a while e) Not used

62. If answer is a) what is the reason for continuous use of oral contraceptive pills regularly?

a) To avoid unwanted pregnancy b) To attend religious function c) By partners

- compulsion d) Don't know e) To avoid going to Valaymapura (Menstrual hut)
63. Have you experienced any side effects after using oral pills? a) Yes b) No
64. If yes, which of the following
- a) Infertility b) Irregular periods c) Increase in body weight d) Vomiting e) No side effects f) Others (specify)
65. According to you how many children should be there in a family?
66. What should be the required age gap between 2 children?
67. Does a family with 2 male child/female child require one more child?
- a) Only for family with 2 girl child b) Only for family with 2 male child c) in both cases d) not required for a and b

Filled by - Name:

Sign:

Verified by:
